# Supplementary material for: The modulation mechanism of geometric and electronic structures of bimetallic catalysts: Pd13−mAgm (m=0–13) clusters for acetylene semi-hydrogenation
Source: Royal Society of Chemistry journal article supplement (doi:10.1039/d2qi01222g), 2022-01-01
Supplement: d2qi01222g1.pdf [file d2qi01222g1.pdf]

**Modulation mechanism of geometric and electronic  
structure of bimetallic catalysts: Pd<sub>13-m</sub>Ag<sub>m</sub> (m=0-13)  
clusters for acetylene semi-hydrogenation**

Panpeng Wei,<sup>a</sup> Jian Zheng,<sup>a</sup> Qiang Li,<sup>b</sup> Yucai Qin,<sup>b\*</sup> Huimin Guan,<sup>b</sup> Duping Tan,<sup>c</sup>

Lijuan Song,<sup>ab\*</sup>

<sup>a</sup> College of Chemistry and Chemical Engineering, China University of Petroleum,  
Qingdao, Shandong 266580, China.

<sup>b</sup> Key Laboratory of Petrochemical Catalytic Science and Technology, Liaoning  
Province, Liaoning Petrochemical University, Fushun, Liaoning 113001, China.

<sup>c</sup> Lanzhou Petrochemical Research Center, Petrochemical Research Institute,  
Petrochina, Lanzhou 730060, China.

\* Corresponding author (E-mail: lsong56@263.net)

## 1. Adsorption properties of C<sub>2</sub>H<sub>2</sub> and C<sub>2</sub>H<sub>4</sub> on Pd<sub>13-m</sub>Ag<sub>m</sub> (m=0-13) clusters at 0 K

The adsorption energy  $\Delta E_{ads}$  of adsorbates species on Pd<sub>13-m</sub>Ag<sub>m</sub> (m=0-13) clusters is as following:

$$\Delta E_{ads} = E_{Ads/Cluster} - E_{Ads} - E_{Cluster} \quad (1)$$

$E_{ads/Cluster}$ ,  $E_{ads}$  and  $E_{Cluster}$  are the energy of Pd<sub>13-m</sub>Ag<sub>m</sub>-C<sub>2</sub>H<sub>x</sub> system, gas-phase C<sub>2</sub>H<sub>x</sub> and bare Pd<sub>13-m</sub>Ag<sub>m</sub> cluster, respectively.

The deformation energy is calculated by

$$E_{def} = E' - E \quad (2)$$

$E'$  is the total energy of the species in the gas phase employing the structure displayed in the adsorbed state and  $E$  is the energy after geometry optimization of the species.

The adsorbate–cluster interaction energy  $E_{int}$  is calculated by

$$E_{int} = E_{Ads/Cluster} - E'_{Ads} - E'_{Cluster} \quad (3)$$

**Table S1** The adsorption energies  $\Delta E_{ads}$  (kJ/mol), acetylene and ethylene deformation energy  $E_{def}(C_2H_x)$  (kJ/mol),  $Pd_{13-m}Ag_m$  deformation energy  $E_{def}(Pd_{13-m}Ag_m)$  (kJ/mol), interaction energy  $E_{int}$  (kJ/mol) for acetylene and ethylene adsorption on  $Pd_{13-m}Ag_m$  (m=0-13) clusters.

| m<br>(Ag atom) | $\Delta E_{ads}$ |          | $E_{def}(C_2H_x)$ |          | $E_{def}(Pd_{13-n}Ag_n)$ |          | $E_{int}$ |          |
|----------------|------------------|----------|-------------------|----------|--------------------------|----------|-----------|----------|
|                | $C_2H_2$         | $C_2H_4$ | $C_2H_2$          | $C_2H_4$ | $C_2H_2$                 | $C_2H_4$ | $C_2H_2$  | $C_2H_4$ |
| 0              | -258.51          | -157.52  | 258.99            | 77.00    | 40.61                    | 9.51     | -535.81   | -242.58  |
| 1              | -254.07          | -138.21  | 272.93            | 68.85    | 41.43                    | 10.85    | -543.67   | -233.43  |
| 2              | -221.58          | -96.94   | 274.54            | 71.99    | 53.30                    | 15.99    | -554.48   | -223.53  |
| 3              | -230.19          | -124.93  | 200.66            | 85.59    | 13.70                    | 10.81    | -457.42   | -226.93  |
| 4              | -212.69          | -123.00  | 192.30            | 89.99    | 21.02                    | 15.34    | -426.87   | -222.07  |
| 5              | -228.53          | -139.03  | 187.81            | 85.93    | 10.36                    | 18.96    | -433.43   | -228.21  |
| 6              | -208.77          | -109.35  | 188.26            | 73.41    | 10.38                    | 5.96     | -433.76   | -198.15  |
| 7              | -135.79          | -84.62   | 172.66            | 22.13    | 5.18                     | 4.37     | -350.83   | -156.91  |
| 8              | -93.72           | -84.45   | 129.57            | 21.94    | 22.00                    | 3.09     | -300.20   | -155.40  |
| 9              | -89.09           | -95.64   | 46.11             | 22.94    | 3.27                     | 3.01     | -183.16   | -161.45  |
| 10             | -91.73           | -85.34   | 41.59             | 21.59    | 6.23                     | 5.10     | -168.75   | -152.27  |
| 11             | -67.95           | -74.92   | 36.82             | 21.73    | 11.86                    | 12.83    | -138.38   | -133.94  |
| 12             | -49.98           | -57.28   | 7.10              | 5.87     | 2.04                     | 2.03     | -67.24    | -78.30   |
| 13             | -34.44           | -42.14   | 3.49              | 4.19     | 3.98                     | 4.37     | -46.94    | -61.84   |

## 2. Electron interaction in $\text{Pd}_{13-m}\text{Ag}_m\text{-C}_2\text{H}_x$ system

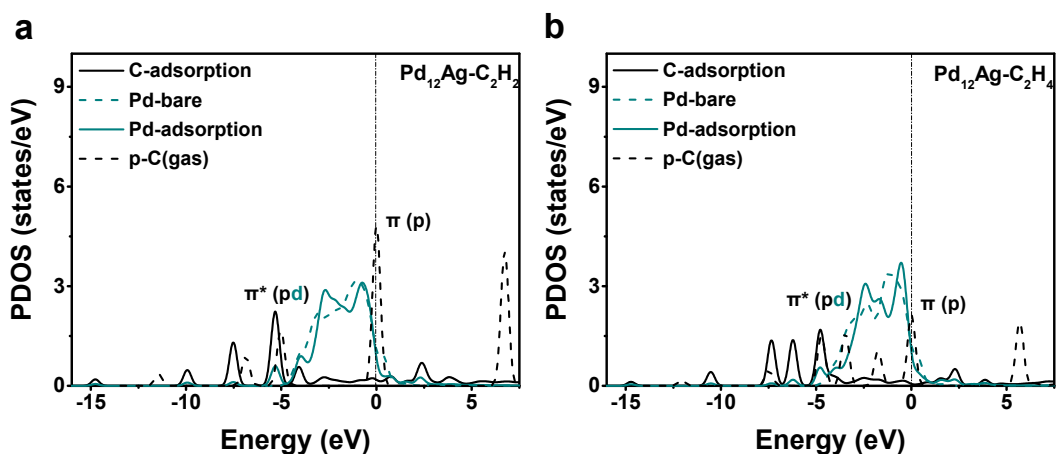

**Figure S1** Density of states for  $\text{Pd}_{12}\text{Ag}$  cluster projected on the bonded Pd atoms and C in acetylene (a) and ethylene (b) before and after adsorption. Dotted lines: before adsorption; solid lines: after adsorption.

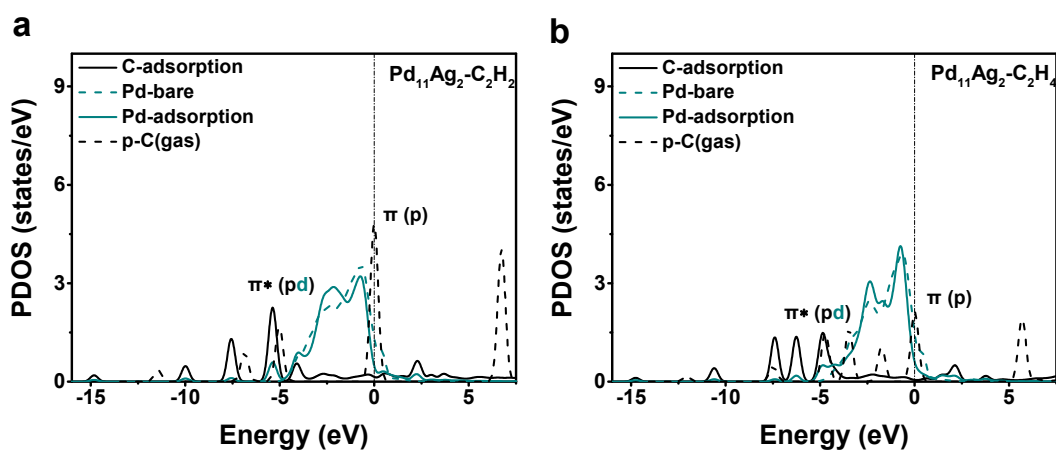

**Figure S2** Density of states for  $\text{Pd}_{11}\text{Ag}_2$  cluster projected on the bonded Pd atoms and C in acetylene (a) and ethylene (b) before and after adsorption. Dotted lines: before adsorption; solid lines: after adsorption.

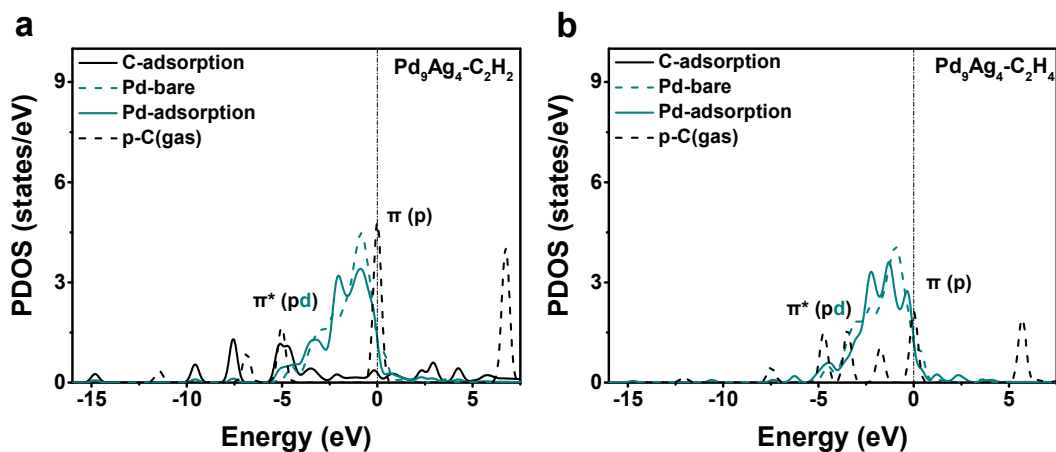

**Figure S3** Density of states for  $\text{Pd}_9\text{Ag}_4$  cluster projected on the bonded Pd atoms and C in acetylene (a) and ethylene (b) before and after adsorption. Dotted lines: before adsorption; solid lines: after adsorption.

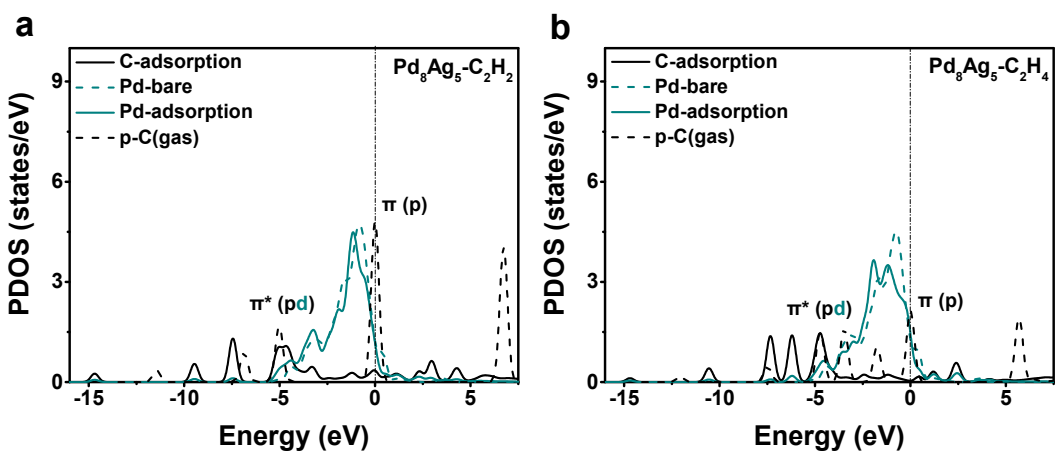

**Figure S4** Density of states for  $\text{Pd}_8\text{Ag}_5$  cluster projected on the bonded Pd atoms and C in acetylene (a) and ethylene (b) before and after adsorption. Dotted lines: before adsorption; solid lines: after adsorption.

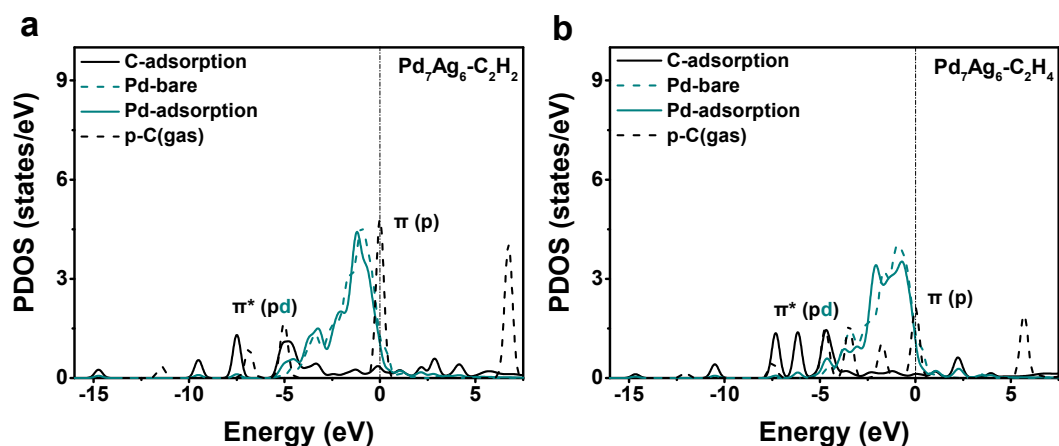

**Figure S5** Density of states for  $\text{Pd}_7\text{Ag}_6$  cluster projected on the bonded Pd atoms and C in acetylene (a) and ethylene (b) before and after adsorption. Dotted lines: before adsorption; solid lines: after adsorption.

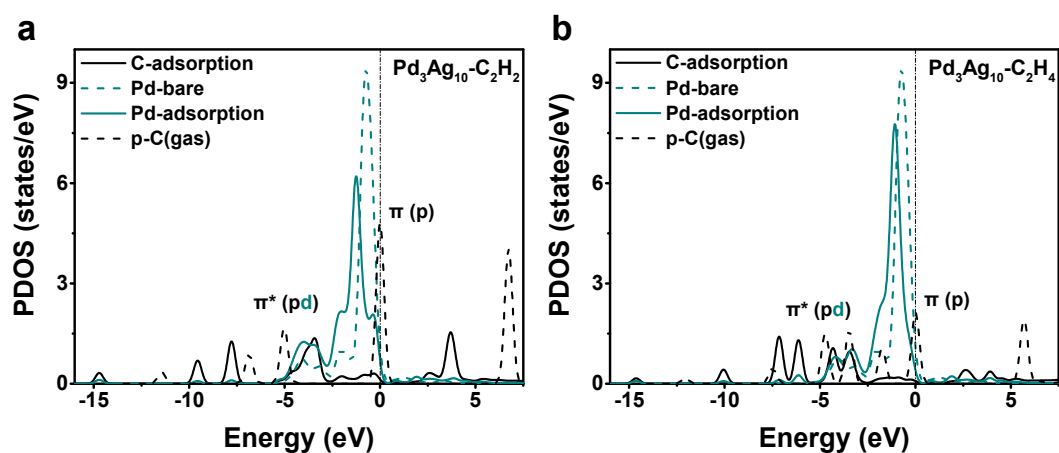

**Figure S6** Density of states for  $\text{Pd}_3\text{Ag}_{10}$  cluster projected on the bonded Pd atoms and C in acetylene (a) and ethylene (b) before and after adsorption. Dotted lines: before adsorption; solid lines: after adsorption.

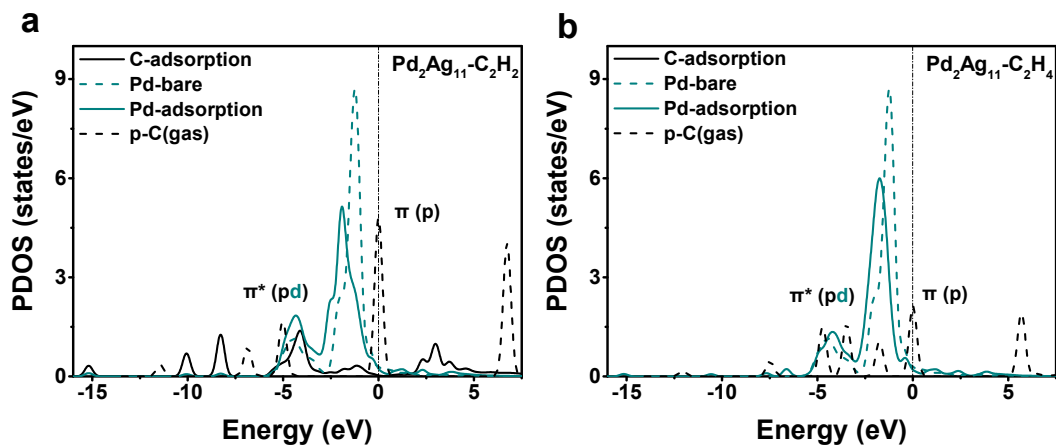

**Figure S7** Density of states for Pd<sub>2</sub>Ag<sub>11</sub> cluster projected on the bonded Pd atoms and C in acetylene (a) and ethylene (b) before and after adsorption. Dotted lines: before adsorption; solid lines: after adsorption.

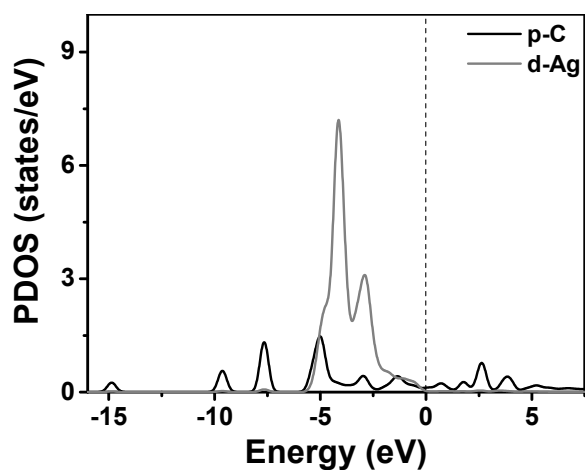

**Figure S8** Density of states for Pd<sub>6</sub>Ag<sub>7</sub> cluster projected on the bonded Ag atoms and C in acetylene

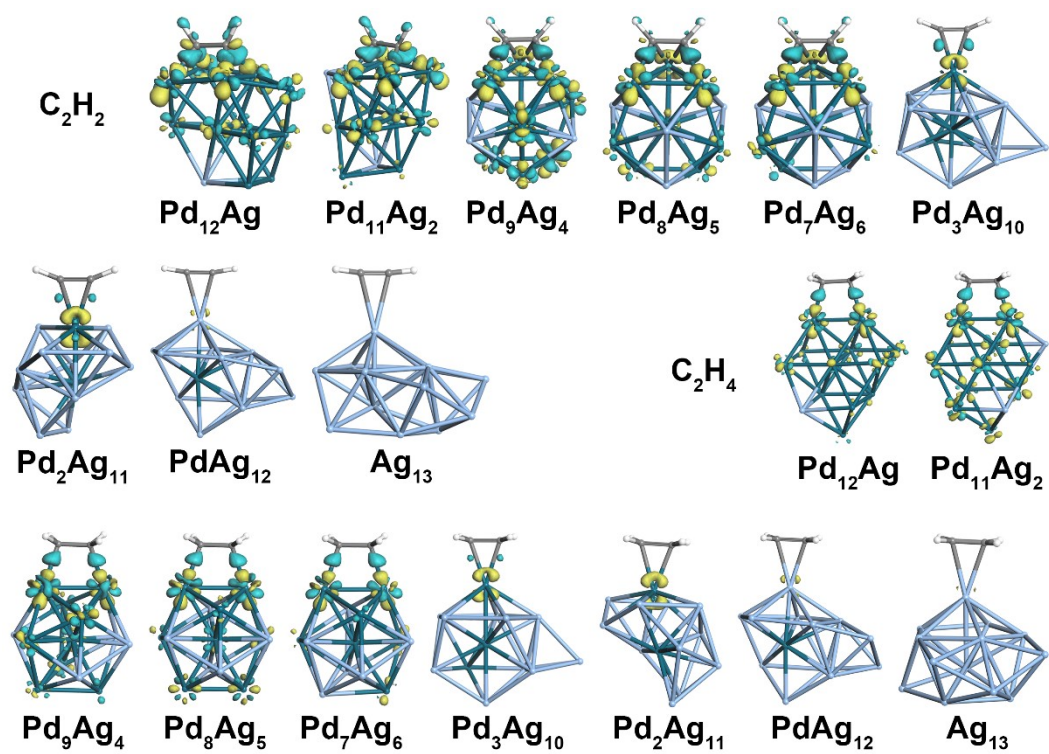

**Figure S9** Electron density difference for the clusters adsorb acetylene and ethylene.

The color scheme is identical to Fig. 3.



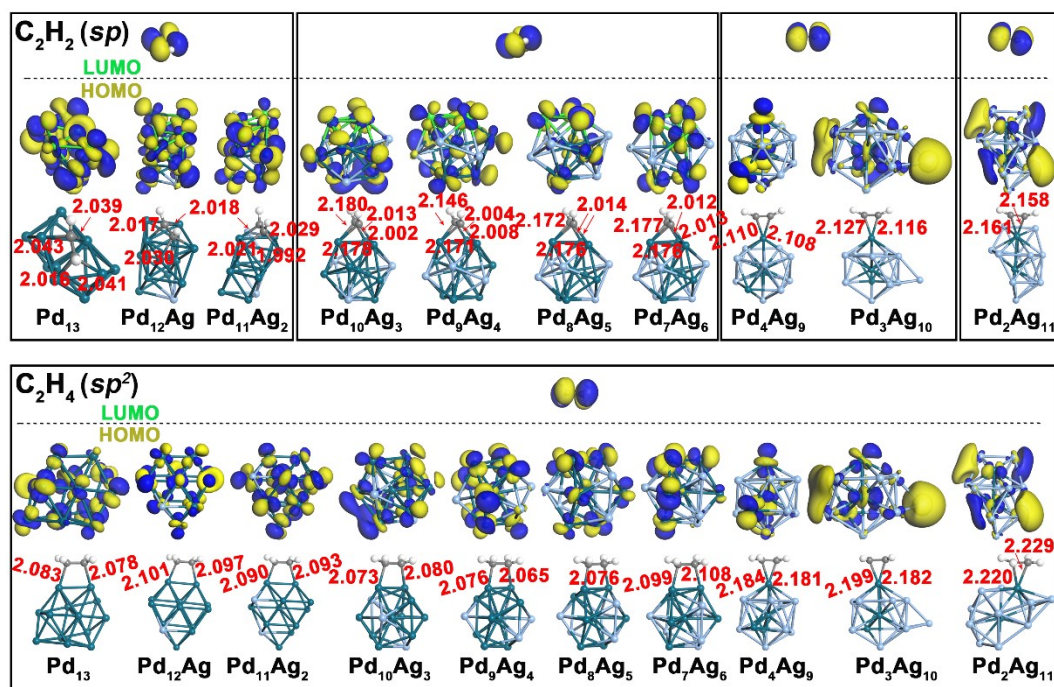

**Figure S10** The lowest unoccupied molecular orbital (LUMO) of acetylene and ethylene molecule and the highest occupied molecular orbital (HOMO) of the clusters (metal atoms bonded to acetylene in some clusters are marked in fluorescent green for clarity). The color/unit scheme is identical to Fig. 5.

## 2. Acetylene hydrogenation on Pd<sub>13-m</sub>Ag<sub>m</sub> clusters at 425 K

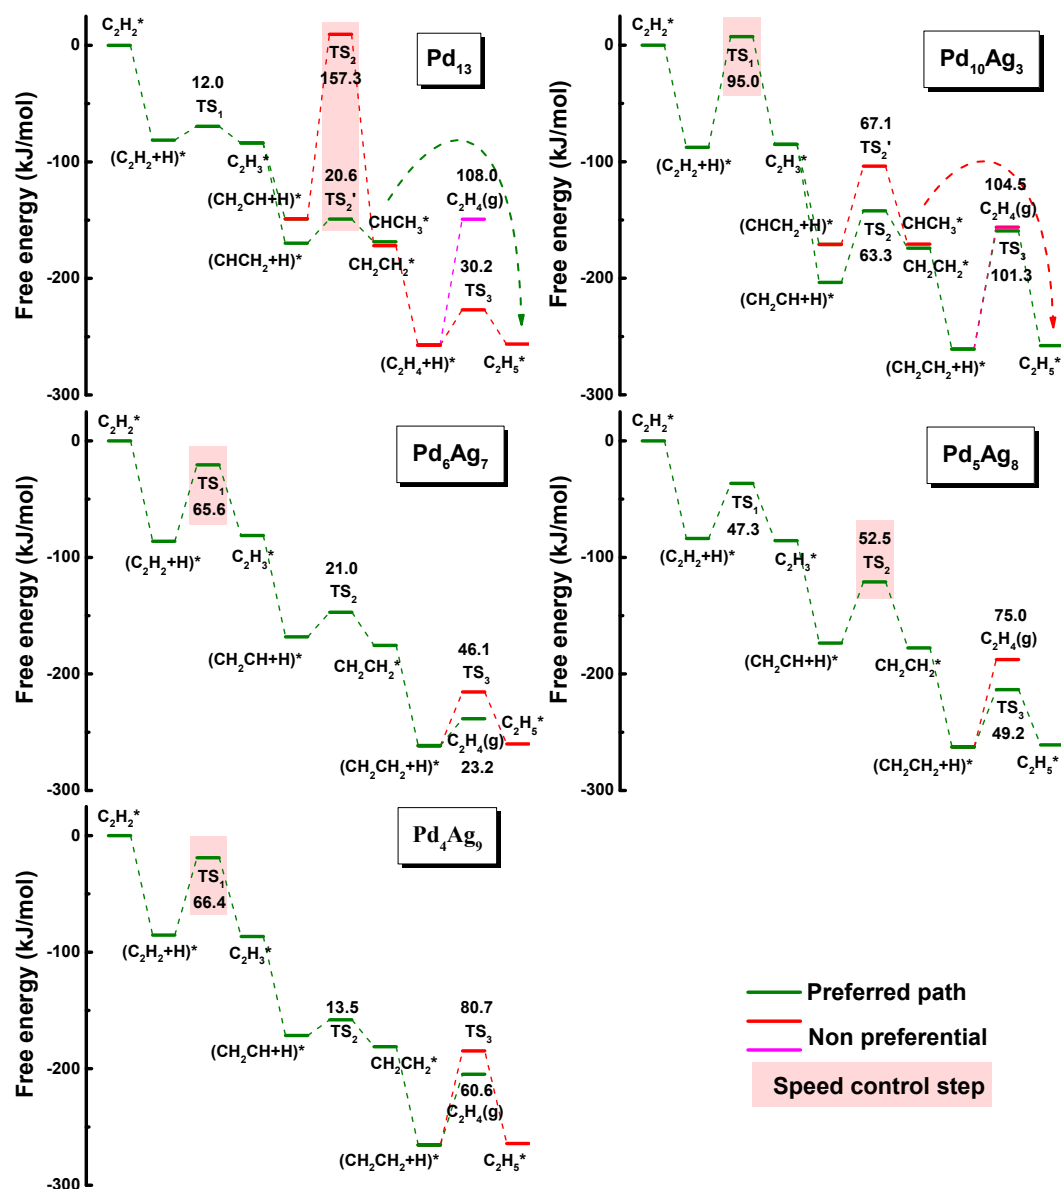

**Figure S11** Potential energy diagram for relative pathways involving in acetylene semi-hydrogenation on Pd<sub>13</sub>, Pd<sub>10</sub>Ag<sub>3</sub>, Pd<sub>6</sub>Ag<sub>7</sub>, Pd<sub>5</sub>Ag<sub>8</sub> and Pd<sub>4</sub>Ag<sub>9</sub> clusters at 425 K (\* denotes the adsorption site).

In order to judge the hydrogenation path of  $C_2H_3$  species (the  $CH_2CH_2$  hydrogenation path or  $CHCH_3$  hydrogenation path) on Pd<sub>13-m</sub>Ag<sub>m</sub> ( $m=0-6$ ) clusters, the difference of free energy  $\Delta G_d$  is employed to determine the stability of  $(CHCH_2+H)^*$  (the adsorption configuration of hydrogen atom near the carbon bonded with two H in

C<sub>2</sub>H<sub>3</sub>) and (CH<sub>2</sub>CH+H)\* (the adsorption configuration of hydrogen atom near the carbon bonded with one H) on Pd<sub>13-m</sub>Ag<sub>m</sub> (m=0-6) cluster, and it is calculated by

$$\Delta G_d = G_{CHCH_2+H} - G_{CH_2CH+H} \quad (4)$$

where  $G_{CHCH_2+H}$  and  $G_{CH_2CH+H}$  are the free energy of Pd<sub>13-m</sub>Ag<sub>m</sub>-(CHCH<sub>2</sub>+H) and Pd<sub>13-m</sub>Ag<sub>m</sub>-(CH<sub>2</sub>CH+H) systems at 425 K.

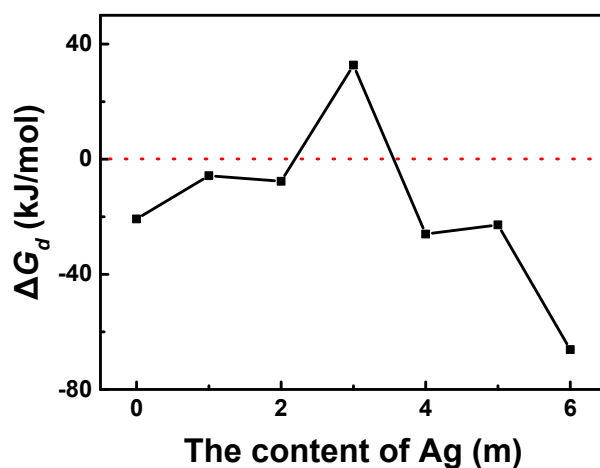

**Figure S12** The difference of free energy of Pd<sub>13-m</sub>Ag<sub>m</sub>-(CHCH<sub>2</sub>+H) and Pd<sub>13-m</sub>Ag<sub>m</sub>-(CH<sub>2</sub>CH+H) systems at 425 K.
